# Supplementary material for: Controllable formation and TEM spatial visualization of cross-linked gold nanoparticle spherical aggregates
Source: Royal Society of Chemistry journal article supplement (doi:10.1039/c1nr10897b), 2011-01-01
Supplement: c1nr10897b.pdf [file c1nr10897b.pdf]

## Controllable formation and TEM spatial visualization of cross-linked gold nanoparticle spherical aggregates

Guangyao Lin<sup>1</sup>, Yong Wang<sup>1</sup>, Qianjun Zhang<sup>1</sup>, Xiaoxiang Zhang<sup>1</sup>, Gang Ji<sup>2</sup>, and Long Ba<sup>1,\*</sup>

<sup>1</sup>State Laboratory of Bioelectronics, School of Biomedical Engineering and Department of Physics, Southeast University, Nanjing 210096, China

<sup>2</sup>Institute of Biophysics, Chinese Academy of Science, Beijing 100201, China

Supplemental material 1:

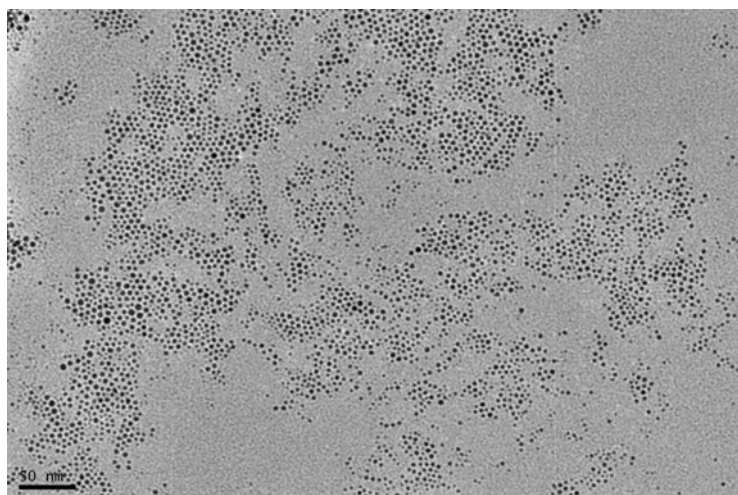

Fig. S1. TEM image of as prepared gold NPs passivated by octanedithiols evaporated from chloroform solution.

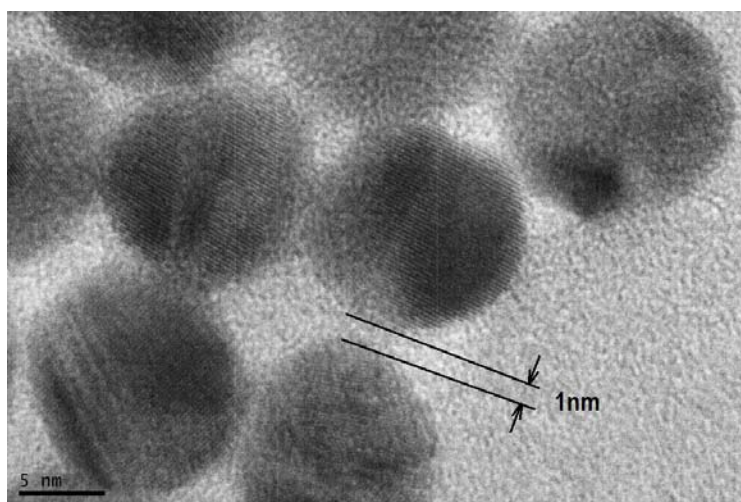

Fig. S1. High Resolution TEM of gold NPs passivated by octanedithiols.

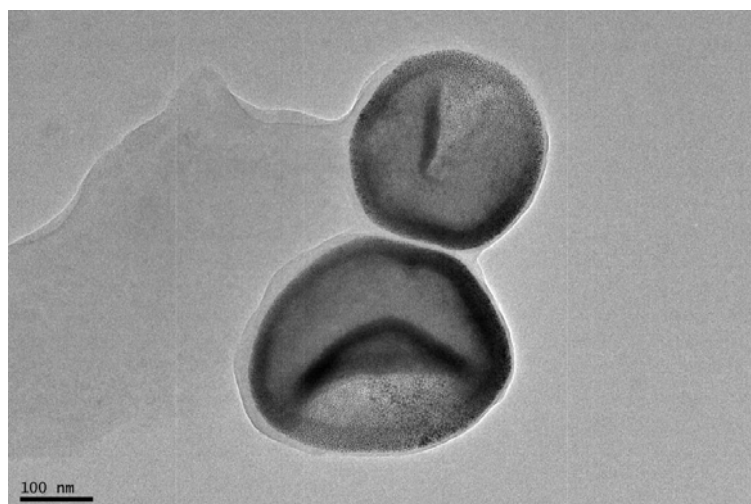

Fig. S3. TEM image of NP aggregates cross-linked by biphenyldithiols at room temperature.
